# Supplementary material for: COVID-19 INDUCES SENESCENCE AND EXHAUSTION OF T CELLS IN PATIENTS WITH MILD/MODERATE AND SEVERE DISEASE DURING A SEVEN-DAY INTERVAL
Source: bioRxiv or medRxiv preprint supplement (doi:10.1101/2023.01.16.23284612), 2023-01-18
Supplement: Supplementary file [file media-1.pdf]

**Supplementary Table 1** – Biomarkers measured by Multiplex (BioRad Bio-Plex Pro Human Cytokine Standard) and their standard settings

| <b>ANALYTE</b>                 | <b>DESCRIPTION</b>                               | <b>Standard PMT Setting (pg/mL)</b> |
|--------------------------------|--------------------------------------------------|-------------------------------------|
| <b>IL-1<math>\beta</math></b>  | Interleukin – 1 beta                             | 1,013                               |
| <b>IL-1Ra</b>                  | Interleukin – 1 alpha                            | 76,896                              |
| <b>IL-2</b>                    | Interleukin – 2                                  | 17,225                              |
| <b>IL-4</b>                    | Interleukin – 3                                  | 1,588                               |
| <b>IL-5</b>                    | Interleukin – 5                                  | 57,568                              |
| <b>IL-6</b>                    | Interleukin – 6                                  | 7,980                               |
| <b>CXCL8</b>                   | Chemokine Ligand-8                               | 17,258                              |
| <b>IL-10</b>                   | Interleukin – 10                                 | 26,569                              |
| <b>IL-12p70</b>                | Interleukin – 12p70                              | 19,101                              |
| <b>IL-13</b>                   | Interleukin – 13                                 | 4,658                               |
| <b>GM-CSF</b>                  | Granulocyte-Macrophage Colony-Stimulating Factor | 6,627                               |
| <b>IFN-<math>\gamma</math></b> | Interferon-gamma                                 | 4,495                               |
| <b>CCL2</b>                    | Chemokine Ligand-2                               | 7,634                               |
| <b>TNF-<math>\alpha</math></b> | Tumoral Necrosis Factor-alpha                    | 53,044                              |
